# Supplementary material for: Molecular Characterization of Non-Neurogenic and Neurogenic Lower Urinary Tract Dysfunction (LUTD) in SCI-Induced and Partial Bladder Outlet Obstruction Mouse Models
Source: MDPI journal article supplement (doi:10.3390/ijms24032451), 2023-01-26
Supplement: s1 [file s1]

sham

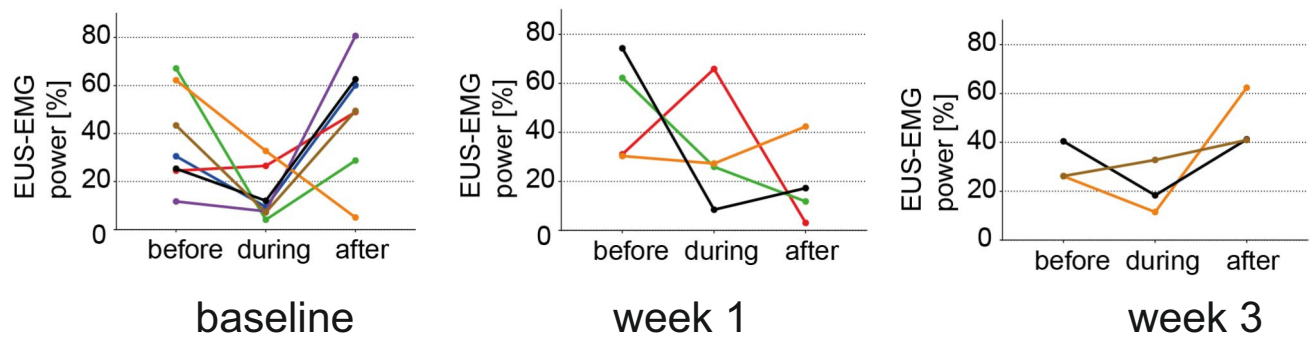

SCI

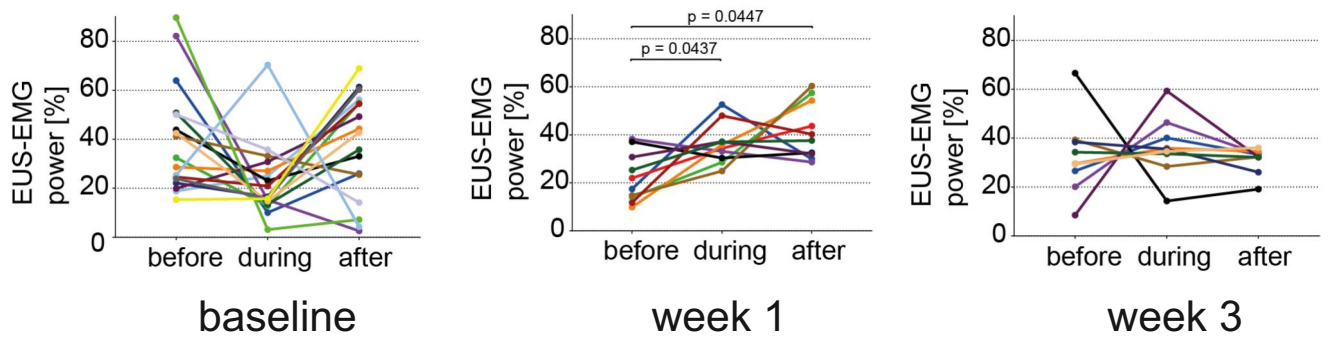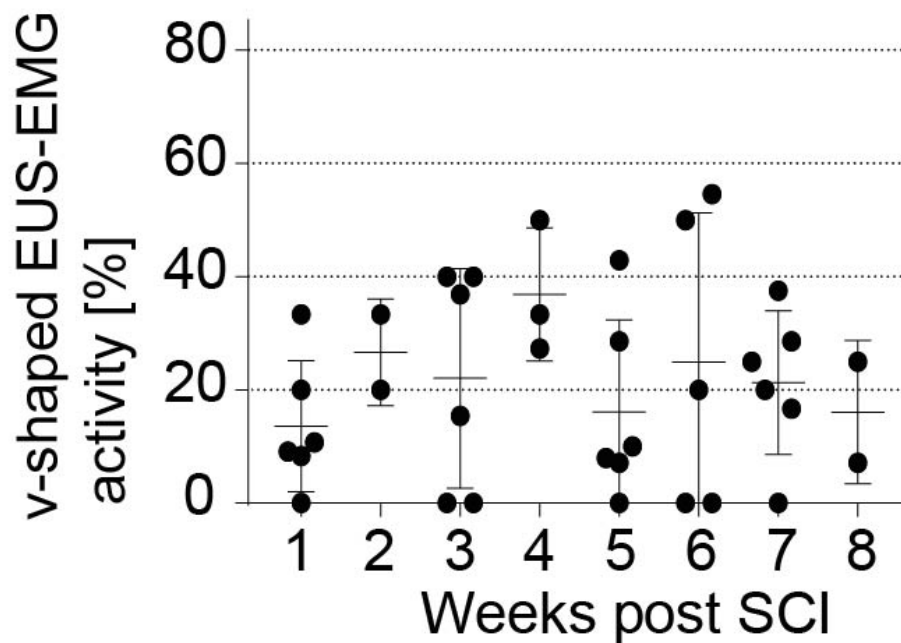

Fig. 1S

**A**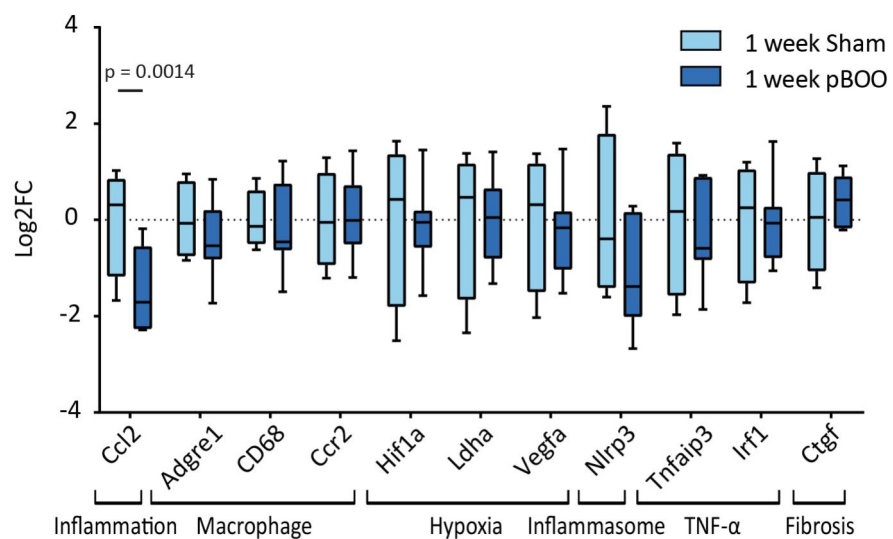**B**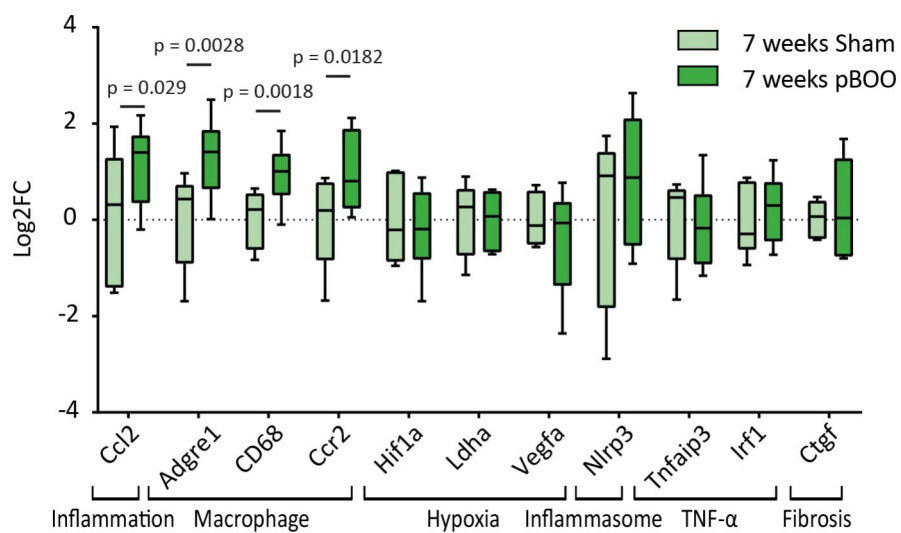**Fig. 2S**

# Reactome

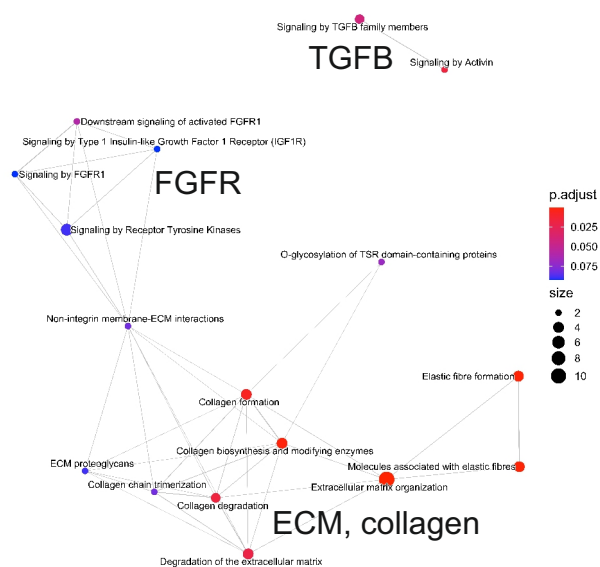

# KEGG

Wnt signaling

TGF-beta signaling

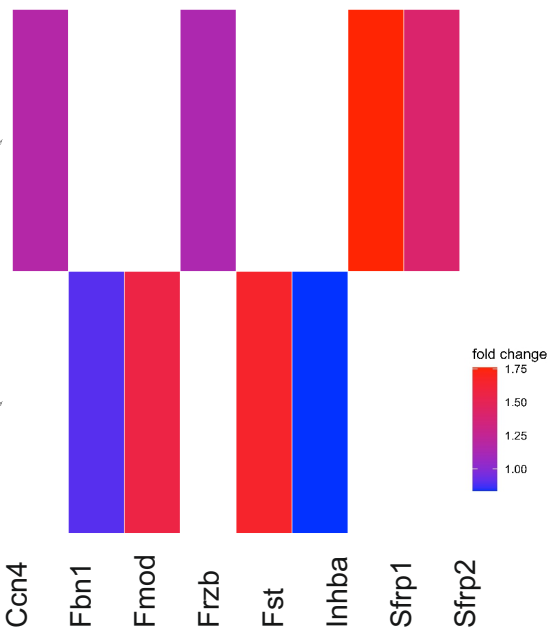

# GO CC

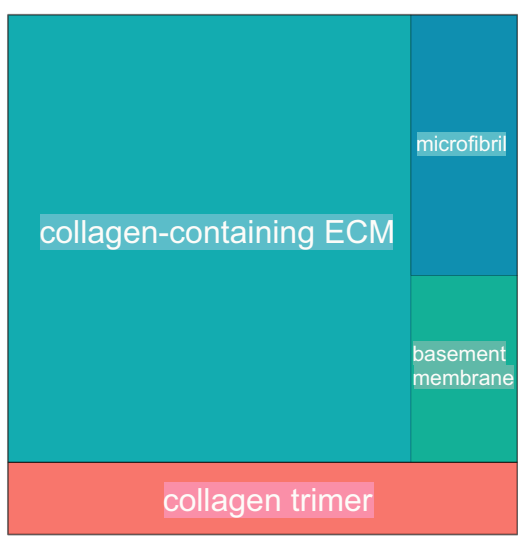

46 common DEGs,  
same regulation

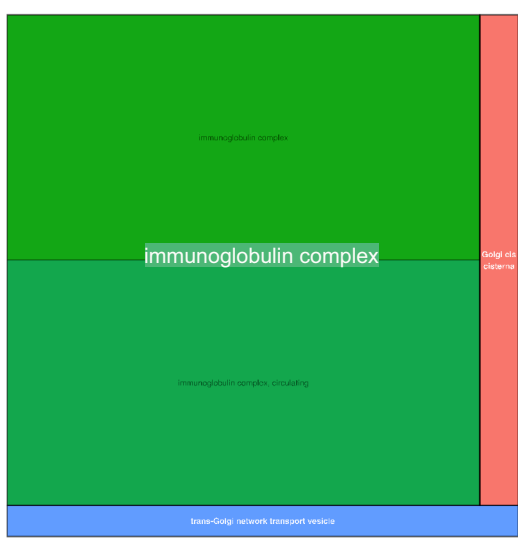

13 common DEGs,  
up in pBOO, down in SCI

Fig. 3S
